# Supplementary material for: Cutaneous Adverse Reactions to Apalutamide: Case Series with Clinical and Pathological Correlations
Source: PubMed Central journal article supplement — Acta Derm Venereol. 2024 Sep 4;104:40719. doi: 10.2340/actadv.v104.40719 (PMC11382552; doi:10.2340/actadv.v104.40719), 2024-09-04
Supplement: ActaDV-104-40719-s2.pdf [file ActaDV-104-40719-s2.pdf]

Supplementary material has been published as submitted. It has not been copyedited, or typeset by Acta Dermato-Venereologica

**Table SI. Adverse cutaneous reactions to apalutamide.** Patient characteristics.

Abbreviations: GC, glucocorticoids; LPT, lymphocyte proliferation test; N/A, missing data

\* Grade of adverse cutaneous reactions to apalutamide was determined following the Common Terminology Criteria for Adverse Events (CMTAE version 5).

| Case | Age (years) | Previous dermatosis | Other medications | Time-to-onset (days) | Grade * | Type of lesions                   | Histology                                               | Blood analysis                         | Treatment                           | Apalutamide discontinuation | LPT             | Patch testing |
|------|-------------|---------------------|-------------------|----------------------|---------|-----------------------------------|---------------------------------------------------------|----------------------------------------|-------------------------------------|-----------------------------|-----------------|---------------|
| 1    | 66          | No                  | Doxorubicin       | 57                   | G3      | Maculopapular eruption            | Mixed pattern with interface and spongiotic dermatitis. | Eosinophilia (2000*10 <sup>9</sup> /L) | Topical GC, Oral GC, Antihistamines | Yes                         | Negative        | Negative      |
| 2    | 90          | No                  | No                | 157                  | G3      | Maculopapular violaceous eruption | N/A                                                     | Non- significant                       | Topical GC, Oral GC, Antihistamines | No (no recurrences)         | Positive (weak) | Negative      |
| 3    | 65          | No                  | Triptorelin       | 122                  | G2      | Maculopapular violaceous eruption | Interface dermatitis with lymphocytic band infiltrate.  | N/A                                    | Topical GC, Antihistamines          | No (no recurrences)         | Negative        | Negative      |
| 4    | 78          | No                  | No                | 91                   | G2      | Maculopapular eruption            | Spongiotic dermatitis.                                  | N/A                                    | Topical GC, Antihistamines          | Yes                         | Positive        | N/A           |
| 5    | 85          | No                  | No                | 223                  | G2      | Maculopapular violaceous eruption | Lichenoid dermatitis with eosinophils.                  | N/A                                    | Topical GC, Antihistamines          | Yes                         | Negative        | N/A           |

|   |    |                |             |     |    |                                          |                                                         |                                       |                                                          |     |                 |          |
|---|----|----------------|-------------|-----|----|------------------------------------------|---------------------------------------------------------|---------------------------------------|----------------------------------------------------------|-----|-----------------|----------|
| 6 | 88 | No             | No          | 111 | G3 | Maculopapular eruption with desquamation | Mixed pattern with interface and spongiotic dermatitis. | Eosinophilia (700*10 <sup>9</sup> /L) | Topical GC, Oral GC, Antihistamines                      | Yes | Negative        | Negative |
| 7 | 76 | Mild Psoriasis | No          | 108 | G3 | Exfoliative erythroderma                 | Spongiotic dermatitis.                                  | Eosinophilia (800*10 <sup>9</sup> /L) | Topical GC, Oral GC, Antihistamines. Hospital admission. | Yes | Negative        | Negative |
| 8 | 74 | No             | Leuprorelin | 43  | G3 | Eczematous eruption                      | Spongiotic dermatitis.                                  | Eosinophilia (900*10 <sup>9</sup> /L) | Topical GC, Oral GC, Antihistamines                      | Yes | Negative        | Negative |
| 9 | 77 | No             | No          | 104 | G3 | Eczematous eruption                      | Spongiotic dermatitis.                                  | Non- significant                      | Topical GC, Oral GC, Antihistamines                      | No  | Positive (weak) | Negative |
